# Supplementary material for: The effects of normalization on the correlation structure of microarray data
Source: Springer Nature journal article supplement (doi:10.1186/1471-2105-6-120), 2005-05-16
Supplement: Additional file 2 [file 1471-2105-6-120-s2.pdf]

## Additional File 2.

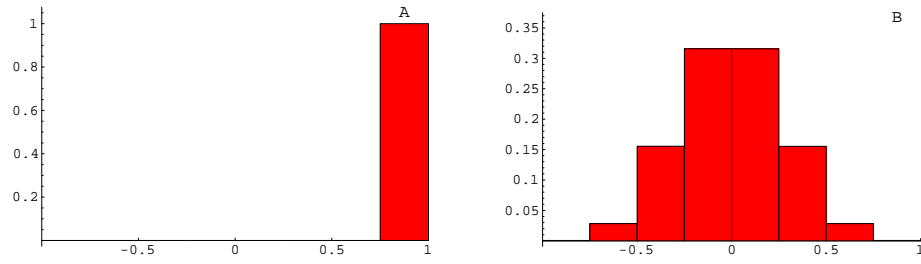

Figure 1: The effect of the normalization procedure  $GEO$  as applied to the SIMU2N data. A: before normalization, B: after normalization.

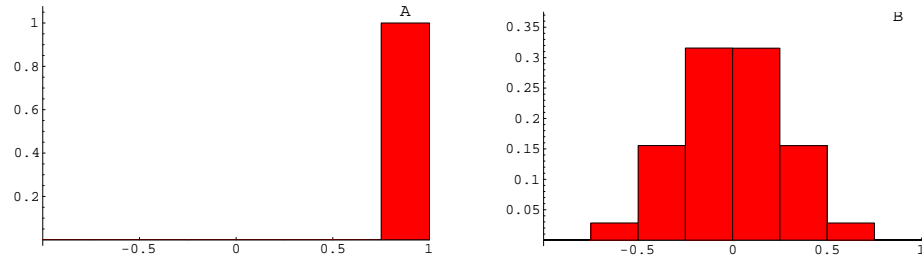

Figure 2: The effect of the normalization procedure *RANK* as applied to the SIMU2N data. A: before normalization, B: after normalization.

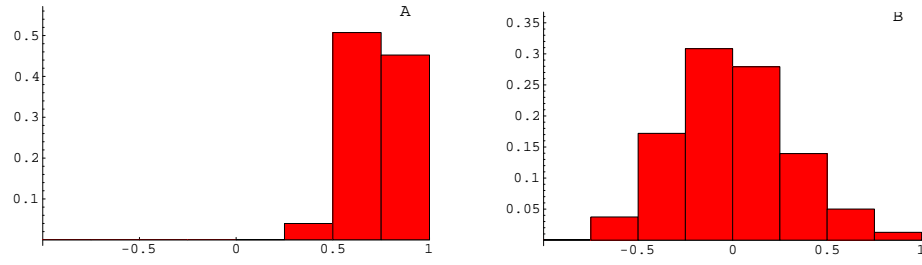

Figure 3: The effect of the normalization procedure *QUANT* as applied to the SIMU3N data. A: before normalization, B: after normalization.
